# Supplementary material for: Effect of Cyclosporine on Reperfusion Injury in Acute Myocardial Infarction
Source: Atypon-hosted journal article supplement (doi:10.1056/nejmoa071142), 2008-07-30
Supplement: nejm_piot_473sa1.pdf [file nejm_piot_473sa1.pdf]

## Supplementary Appendix

This appendix has been provided by the authors to give readers additional information about their work.

Supplement to: Piot C, Croisille P, Staat P, et al. Effect of cyclosporine on reperfusion injury in acute myocardial infarction. *N Engl J Med* 2008;359:473-81.

**Table: Baseline Characteristics of the MRI patients sub-group. \***

|                                           | <b>Cyclosporine Group</b> | <b>Control Group</b> |
|-------------------------------------------|---------------------------|----------------------|
|                                           | <b>(N = 16)</b>           | <b>(N = 11)</b>      |
| Age (yr)                                  | 57±3                      | 61±4                 |
| Sex (M/F)                                 | 14/2                      | 9/2                  |
| Body-mass index†                          | 27±1                      | 25±1                 |
| Hypertension (no.)                        | 6                         | 4                    |
| Smoking (no.)                             | 10                        | 7                    |
| Dyslipidemia (no.)                        | 7                         | 5                    |
| Diabetes (no.)                            | 4                         | 3                    |
| History of coronary artery disease (no.)  | 0                         | 1                    |
| <u>Angiographic findings</u>              |                           |                      |
| Infarct-related artery (no.)              |                           |                      |
| LAD                                       | 7                         | 5                    |
| RCA                                       | 8                         | 5                    |
| LCCA                                      | 1                         | 1                    |
| Left ventricular ejection fraction (%)    | 46±2                      | 44±3                 |
| Abnormally contracting segments (%)       | 44±2                      | 41±3                 |
| <u>Ischemia time (min)</u>                | 297±23                    | 323±34               |
| <u>Percutaneous coronary intervention</u> |                           |                      |
| Stenting of culprit lesion (no.)          | 16                        | 11                   |
| Postprocedure TIMI flow grade             | 2.7±0.2                   | 2.8±0.1              |
| TIMI flow grade <2 (no.)                  | 2                         | 1                    |
| <u>Treatment before PCI (no.)</u>         |                           |                      |
| Intravenous nitrates                      | 8                         | 5                    |
| Morphine                                  | 5                         | 4                    |
| Thrombolytic agents (failed)              | 1                         | 1                    |
| <u>Treatment at time of PCI (no.)</u>     |                           |                      |
| Heparin                                   | 16                        | 11                   |
| Aspirin or clopidogrel                    | 16                        | 11                   |
| Glycoprotein IIb/IIIa inhibitor           | 4                         | 5                    |

\* Plus-minus values are means ±SD. PCI denotes percutaneous coronary intervention, and TIMI Thrombolysis in Myocardial Infarction. † The body-mass index is the weight in kilograms divided by the square of the height in meters.
